# Supplementary material for: ncRNA therapy with miRNA-22-3p suppresses the growth of triple-negative breast cancer
Source: PubMed Central journal article supplement — Mol Ther Nucleic Acids. 2021 Jan 20;23:930–43. doi: 10.1016/j.omtn.2021.01.016 (PMC7868999; doi:10.1016/j.omtn.2021.01.016), 2021-01-20
Supplement: mmc1.pdf [file mmc1.pdf]

## Supplemental Information

### **ncRNA therapy with miRNA-22-3p suppresses the growth of triple-negative breast cancer**

**Aysegul Gorur, Recep Bayraktar, Cristina Ivan, Hamada Ahmed Mokhlis, Emine Bayraktar, Nermin Kahraman, Didem Karakas, Selda Karamil, Nashwa N. Kabil, Pinar Kanlikilicer, Burcu Aslan, Lulufer Tamer, Zhihui Wang, Vittorio Cristini, Gabriel Lopez-Berestein, George Calin, and Bulent Ozpolat**

SUPPLEMENTAL INFORMATION

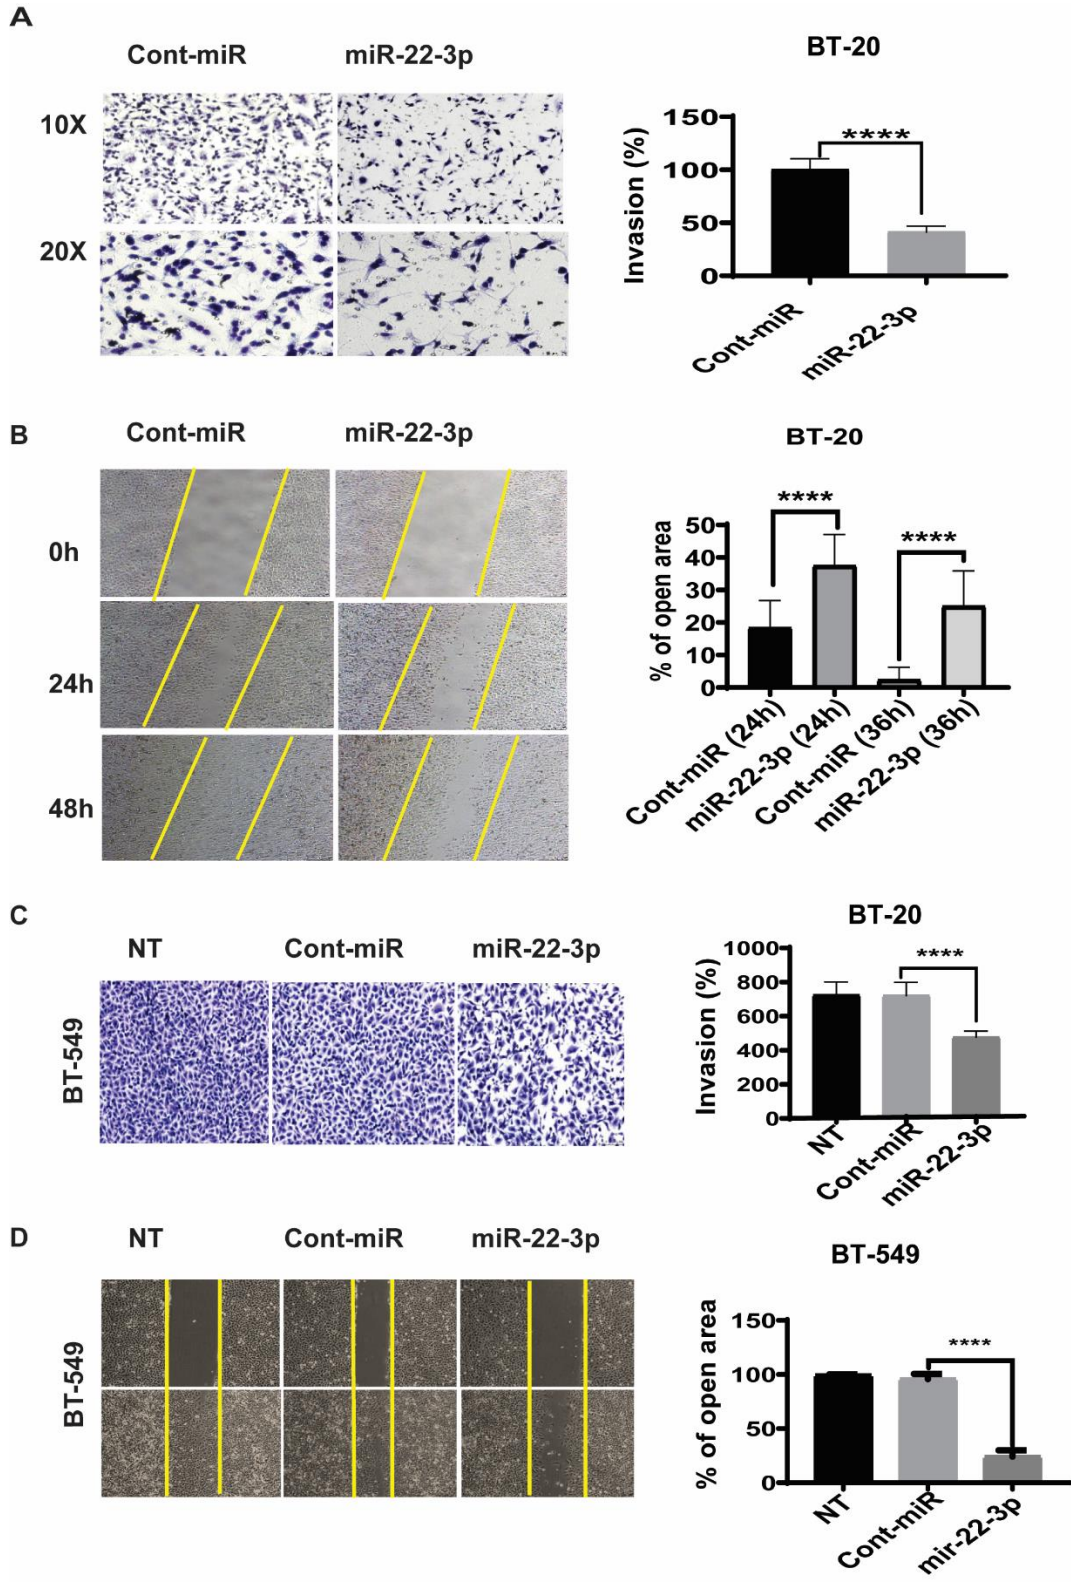

**Figure S1. Ectopic miR-22-3p Expression Suppresses Invasion and Migration of BT-20 and BT-549 Breast Cancer Cells.**

The invasiveness of BT-20 (A) and BT-549 (C) cells was assessed using a Matrigel Transwell assay. The cells were transfected with miR-22-3p or a control miRNA (Cont-miR) or left untreated (NT). After 72 h, the cells were transferred to Transwell chambers and incubated for 24 h. The invading cells were counted, and mean ( $\pm$  SD) values from triplicate experiments are shown on the right ( $p < 0.0001$ ). Also, BT-20 (B) and BT-549 (D) cells were transfected with miR-22-3p or Cont-miR or left untreated. Their migration capacity was then assessed using a wound healing assay. Transfected cells were cultured for 72 h, and a wound was formed on each cell monolayer via scraping with a scalpel. The cells in the wounded area were counted at 0 and 48 h. \*\*\*\*,  $p < 0.0001$ .
